# Supplementary material for: Cadmium Ecotoxic Effects on Embryonic Dmrt1 and Aromatase Expression in Chrysemys picta Turtles May Implicate Changes in DNA Methylation
Source: MDPI journal article supplement (doi:10.3390/genes13081318), 2022-07-24
Supplement: s1 [file s1]

## Supplementary information

# Cadmium Ecotoxic Effects on Embryonic *Dmrt1* and *aromatase* Expression in *Chrysemys picta* Turtles may Implicate Changes in DNA Methylation

Beatriz Mizoguchi \*, Nicholas E. Topping, Andrew M. Lavin and Nicole Valenzuela

Department of Ecology, Evolution and Organismal Biology, Iowa State University, Ames, IA 50011, USA; topping@iastate.edu (N.E.T.); andrewlav208@gmail.com (A.M.L.); nvalenzu@iastate.edu (N.V.)

\* Correspondence: mizoguchibeatriz@gmail.com

This Supplementary file contains:

- Supplementary Table S1: Normalized gene expression data used in this study.

**Supplementary Table S1: Normalized gene expression data used in this study**

| STAGE | TEMPERATURE | Log2(Aromatase/GAPDH) | STAGE | TEMPERATURE | Log2(Dmrt1/ $\beta$ actin) |
|-------|-------------|-----------------------|-------|-------------|----------------------------|
| 9     | 26          | 0.719004532           | 9     | 26          | 1.128333152                |
| 9     | 26          | 1.439785323           | 9     | 26          | 1.137785578                |
| 9     | 26          | 1.039761835           | 9     | 26          | 0.750679458                |
| 9     | 26          | 1.051554626           | 9     | 26          | 1.071607414                |
| 9     | 26          | 1.458027371           | 9     | 26          | 0.944148975                |
| 9     | 26          | 1.139862166           | 9     | 26          | 1.136296534                |
| 9     | 26          | 1.409754147           | 9     | 26          | 1.093986252                |
| 9     | 26          | 0.595566711           | 9     | 26          | 0.95272863                 |
| 9     | 26          | 0.978191628           | 9     | 26          | 0.917826684                |
| 9     | 26          | 1.070206792           | 9     | 26          | 1.209474205                |
| 9     | 26          | 1.28721907            | 9     | 26          | 1.545475571                |
| 9     | 26          | 1.399610552           | 9     | 26          | 0.334063532                |
| 9     | 26          | 0.69088359            | 9     | 26          | 1.106483006                |
| 9     | 26          | 1.631845326           | 9     | 26          | 0.66956533                 |
| 9     | 26          | 0.550760495           | 9     | 26          | 1.614840226                |
| 9     | 31          | 1.087631427           | 9     | 31          | 1.337747414                |
| 9     | 31          | 1.494691215           | 9     | 31          | 0.498515001                |
| 9     | 31          | 0.539360541           | 9     | 31          | 0.709916769                |
| 9     | 31          | 0.685846659           | 9     | 31          | 1.668911512                |
| 9     | 31          | 0.605633565           | 9     | 31          | 1.094225417                |
| 9     | 31          | 1.579318102           | 9     | 31          | 0.776694023                |
| 9     | 31          | 0.982186425           | 9     | 31          | 1.056317679                |
| 9     | 31          | 0.471923062           | 9     | 31          | 0.856666969                |
| 9     | 31          | 1.320018              | 9     | 31          | 0.41652167                 |
| 9     | 31          | 0.406040045           | 9     | 31          | 0.718183644                |
| 9     | 31          | 1.372723145           | 9     | 31          | 0.817796701                |
| 9     | 31          | 1.558793353           | 9     | 31          | 1.004188022                |
| 9     | 31          | 0.342915877           | 9     | 31          | 0.783361096                |
| 9     | 31          | 0.93795136            | 9     | 31          | -0.120316446               |
| 9     | 31          | 0.370471929           | 9     | 31          | 0.570178887                |
| 15    | 26          | 1.938168375           | 15    | 26          | 1.147560366                |
| 15    | 26          | 2.028250212           | 15    | 26          | 1.636145711                |
| 15    | 26          | 32.91002175           | 15    | 26          | 1.706700554                |
| 15    | 26          | 2.270608389           | 15    | 26          | 1.206957881                |
| 15    | 26          | 3.105936645           | 15    | 26          | 1.039452276                |
| 15    | 26          | 1.977261615           | 15    | 26          | 1.143525898                |
| 15    | 26          | 2.846576235           | 15    | 26          | 1.978123427                |
| 15    | 26          | 1.606827521           | 15    | 26          | 1.124980852                |
| 15    | 26          | 1.747501401           | 15    | 26          | 1.522066805                |
| 15    | 26          | 1.563912541           | 15    | 26          | 2.724134287                |
| 15    | 26          | 2.000319315           | 15    | 26          | 1.558403598                |
| 15    | 26          | 2.272354877           | 15    | 26          | 2.044473511                |
| 15    | 31          | 1.426009965           | 15    | 31          | 2.91456419                 |
| 15    | 31          | 1.841973134           | 15    | 31          | 1.64379965                 |
| 15    | 31          | 155.1899604           | 15    | 31          | 1.700813719                |
| 15    | 31          | 1.320419334           | 15    | 31          | 2.656173907                |
| 15    | 31          | -8.458832141          | 15    | 31          | 2.749149294                |
| 15    | 31          | 1.377824095           | 15    | 31          | 1.036280965                |
| 15    | 31          | 2.396795577           | 15    | 31          | 1.895581312                |
| 15    | 31          | 2.15145769            | 15    | 31          | 1.415243922                |
| 15    | 31          | -9.245621982          | 15    | 31          | 2.571479886                |
| 15    | 31          | -6.745285836          | 15    | 31          | 3.237381279                |
| 15    | 31          | 1.574125254           | 15    | 31          | 1.227004654                |
| 15    | 31          | 1.018268779           | 15    | 31          | 1.181525041                |
| 22    | 26          | 2.07682587            | 22    | 26          | 0.186355891                |
| 22    | 26          | 1.716334866           | 22    | 26          | 1.301002918                |
| 22    | 26          | 1.727494927           | 22    | 26          | 0.403928472                |
| 22    | 26          | 2.173658309           | 22    | 26          | 1.293746289                |
| 22    | 26          | 1.381736464           | 22    | 26          | 0.719384717                |
| 22    | 26          | 1.998374648           | 22    | 26          | 1.517263655                |
| 22    | 26          | 2.039837674           | 22    | 26          | 1.017436572                |
| 22    | 26          | 1.908173647           | 22    | 26          | 1.202847572                |
| 22    | 26          | 1.984646185           | 22    | 26          | 1.383561928                |
| 22    | 31          | 1.944842998           | 22    | 26          | 0.294717452                |
| 22    | 31          | -3.080707695          | 22    | 31          | 0.120869061                |
| 22    | 31          | 1.420863987           | 22    | 31          | 1.804726044                |
| 22    | 31          | 1.862459783           | 22    | 31          | 2.327087735                |
| 22    | 31          | 2.318446894           | 22    | 31          | 1.988995604                |
| 22    | 31          | 2.481986642           | 22    | 31          | 1.431972253                |
| 22    | 31          | 1.458563737           | 22    | 31          | 0.581264718                |
| 22    | 31          | 1.018467547           | 22    | 31          | 1.018461747                |
| 22    | 31          | 2.45826473            | 22    | 31          | 1.071546175                |
| 22    | 31          | 1.028457274           | 22    | 31          | 1.194756727                |
|       |             |                       | 22    | 31          | 1.17164611                 |
